# Supplementary material
Source: HighWire-hosted journal article supplement (https://adc.bmj.com/content/102/12/1118)

Online supplementary appendix C:  
 Conservative treatment with versus without faecolith:  
 Forest plot for complications

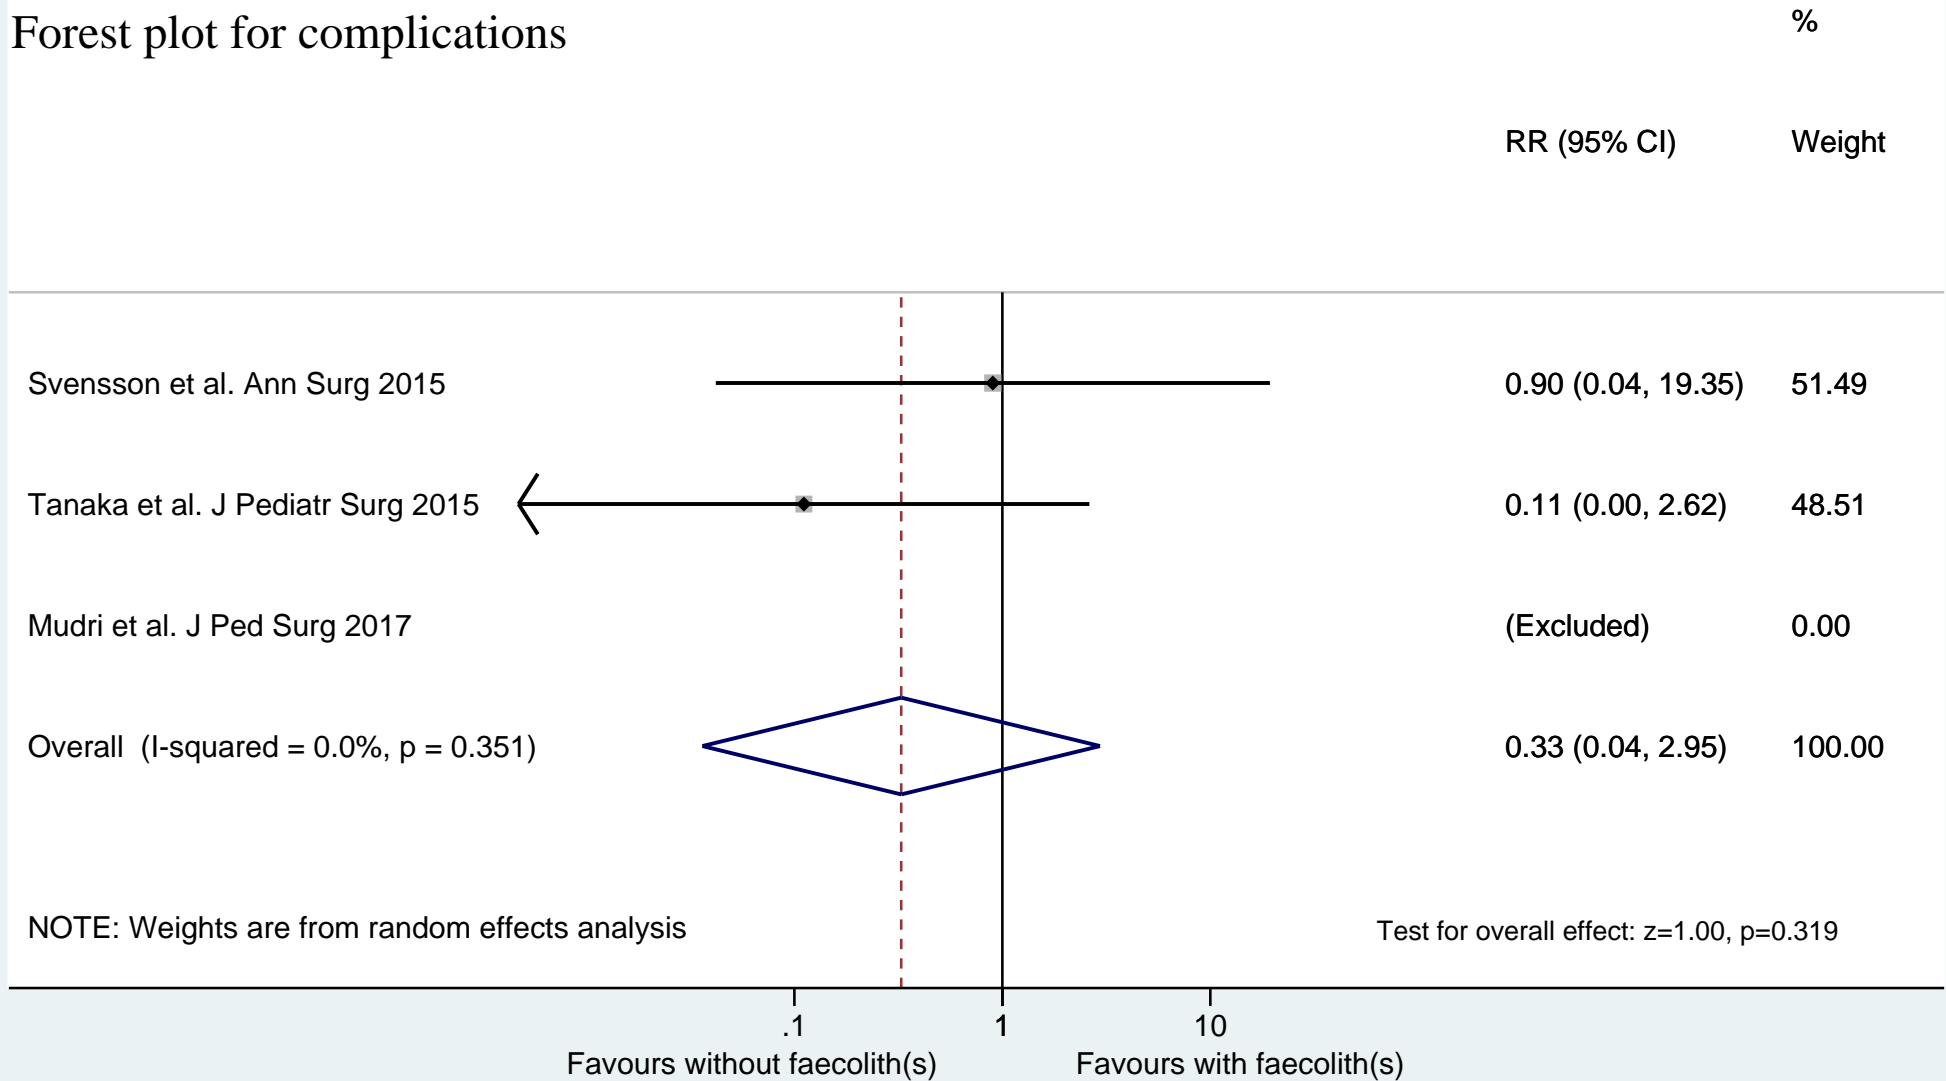

Online supplementary appendix C:  
 Conservative treatment with versus without faecolith:  
 Forest plot for efficacy

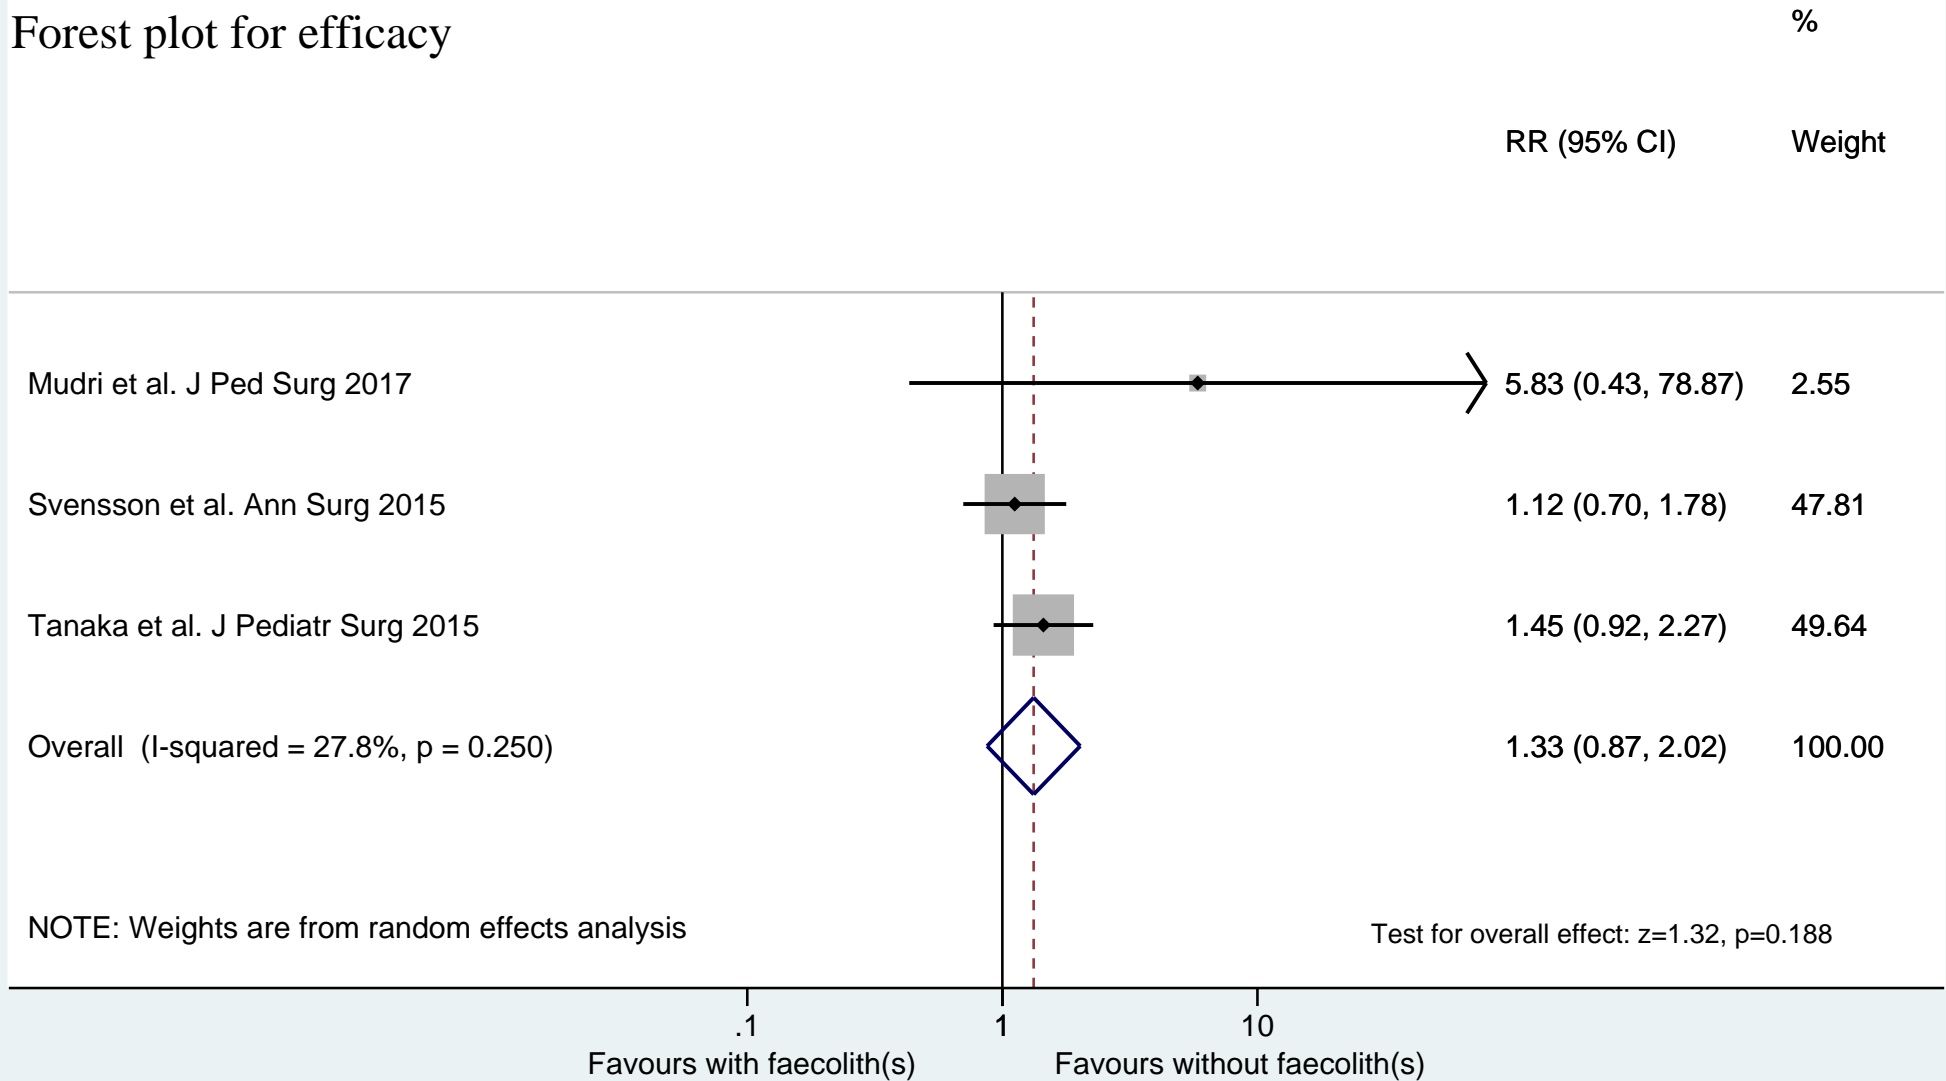

Online supplementary appendix C:  
Conservative treatment with versus without faecolith:  
Forest plot for readmission

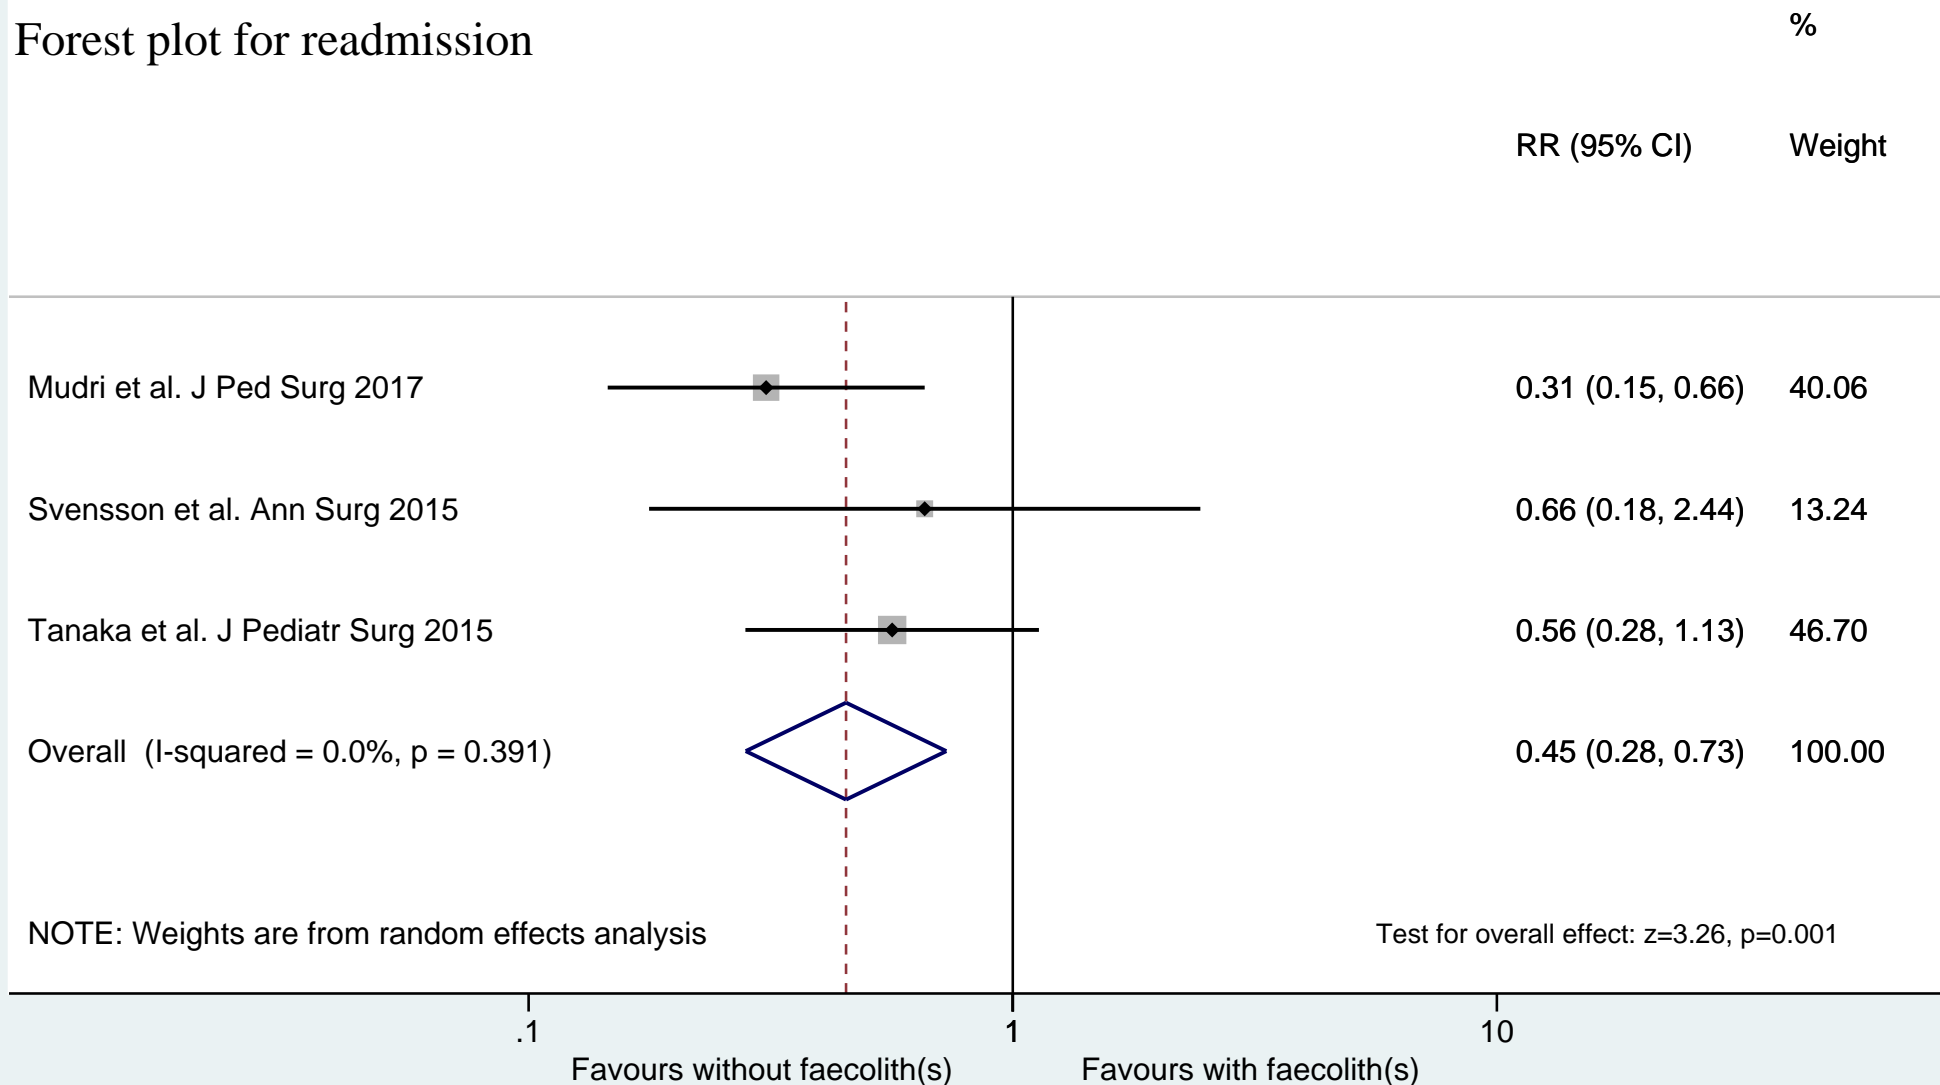

Supplement: inline-supplementary-material-3 [file inline-supplementary-material-3.pdf]
